# Supplementary material for: Recycling of PE glove waste as highly valuable products for efficient separation of oil-based contaminants from water
Source: Royal Society of Chemistry journal article supplement (doi:10.1039/c6ta08749c), 2016-01-01
Supplement: c6ta08749c1.pdf [file c6ta08749c1.pdf]

## Supporting Information

# Recycling of PE gloves waste as highly valuable products for efficient separation of oil-based contaminants from water

Qingdong Zhang <sup>a</sup>, Yingze Cao <sup>a, b</sup>, Na Liu <sup>a</sup>, Weifeng Zhang <sup>a</sup>, Yuning Chen <sup>a</sup>, Xin Lin <sup>a</sup>, Yen Wei <sup>a</sup>, Lin Feng <sup>a\*</sup> and Lei Jiang <sup>c</sup>

<sup>a</sup> Department of Chemistry, Tsinghua University, Beijing, 100084, P. R. China

<sup>b</sup> Qian Xuesen Laboratory of Space Technology, China Academy of Space Technology, Beijing, 100094, China

<sup>c</sup> Key Laboratory of Bio-Inspired Smart Interfacial Science and Technology of Ministry of Education, School of Chemistry and Environment, Beihang University, Beijing, 100191, P. R. China

fl@mail.tsinghua.edu.cn

| <b>Types of oil/water separation materials</b>         | <b>Raw materials</b>                                                                      | <b>Methods</b>                                                                                                                              | <b>Intrusion pressure</b> | <b>Separation efficiency</b>   | <b>References</b> |
|--------------------------------------------------------|-------------------------------------------------------------------------------------------|---------------------------------------------------------------------------------------------------------------------------------------------|---------------------------|--------------------------------|-------------------|
| PE coated mesh                                         | Recycled PE gloves, nontoxic                                                              | Simple immersion for several seconds, time-saving                                                                                           | 6.5 kPa                   | 99.9%                          | Our work          |
| PDA-NDM mesh                                           | Dopamine, n-dodecyl mercaptan, low-toxic                                                  | First immersion in solution of dopamine for 40 h, then reacted with NDM for 6h                                                              | 2.18kPa                   | 98.12%                         | 42                |
| Octadecylphosphonic acid (ODPA) coated mesh            | Octadecylphosphonic acid, low-toxic                                                       | Simple immersion method                                                                                                                     | NA                        | 99%                            | 43                |
| PTFE-containing coated mesh                            | Polytetrafluoroethylene, polyvinyl acetate, sodium dodecyl benzene sulfonate, fluorinated | Complicated spray and calcination method                                                                                                    | NA                        | 95%                            | 8                 |
| Layered double hydroxides (LDH) functionalized textile | Magnesium nitrate hexahydrate, aluminum nitrate nonahydrate, low-toxic                    | Synthesizing LDH precursors and then hydrothermally treated for 24h, finally the textile was immersed in solution of sodium laurate for 1 h | NA                        | 97%                            | 44                |
| Silicone nanofilaments coated polyester textile        | Trichloromethylsilane, high-toxic                                                         | Complicated CVD method                                                                                                                      | NA                        | High (qualitative description) | 45                |

|                                               |                                                                                                          |                                                                                                                                                 |           |                                |    |
|-----------------------------------------------|----------------------------------------------------------------------------------------------------------|-------------------------------------------------------------------------------------------------------------------------------------------------|-----------|--------------------------------|----|
| Bioinspired multifunctional polyurethane foam | Chromic acid, fluoroalkylsilane, high-toxic and fluorinated                                              | The foam was etched with chromic acid and then was modified with solution of fluoroalkylsilane for 24h                                          | NA        | 95.5%-98%                      | 46 |
| BNNT-coated mesh                              | Boron powder, NH <sub>3</sub>                                                                            | Boron powder was first ball-milled for 50 h and then annealed at 1100 °C for 8 h under H <sub>2</sub> /N <sub>2</sub> gas                       | NA        | High (qualitative description) | 47 |
| FAS or SYLGARD coated mesh                    | 1H,1H,2H,2H-Perfluorooctyltriethoxysilane, SYLGARD 184 Silicone Elastomer, toxic and fluorinated         | The mesh was first immersed into CuCl <sub>2</sub> solution and then was immersed in a FAS ethanol solvent, finally was dissolved in chloroform | NA        | 96%                            | 48 |
| Polyaniline (PANI) coated cotton fabric       | Aniline, PTES (C <sub>14</sub> H <sub>19</sub> F <sub>13</sub> O <sub>3</sub> Si), toxic and fluorinated | Complicated vapor phase deposition method                                                                                                       | NA        | 97.8%                          | 49 |
| PLA oil absorption and filtration materials   | PLA                                                                                                      | Non-solvent induced phase separation and template synthesis method                                                                              | 1.0 kPa   | 97%                            | 50 |
| PDVB modified mesh                            | Divinylbenzene, 2,2'-azoisobutyronitrile, ethyl acetate                                                  | Solvothermal route                                                                                                                              | 6.027 kPa | 99.99%                         | 16 |
| ZnO coated mesh                               | ZnO nanoparticles, Stearic acid                                                                          | A spray-coating process through tuning the surface composition                                                                                  | 2.45 kPa  | 98.5%                          | 51 |

|                                        |                                                      |                                                                                                  |          |     |    |
|----------------------------------------|------------------------------------------------------|--------------------------------------------------------------------------------------------------|----------|-----|----|
| Graphdiyne-based superhydrophobic foam | Pretreated-copper foam, TMEDA, pyridine, and acetone | In situ Glaser–Hay coupling by using copper foam as both robust 3D porous substrate and catalyst | 0.87 kPa | 98% | 52 |
|----------------------------------------|------------------------------------------------------|--------------------------------------------------------------------------------------------------|----------|-----|----|

**Table S1** Comparison of the properties between the PE coated mesh and the reported oil/water separation materials.

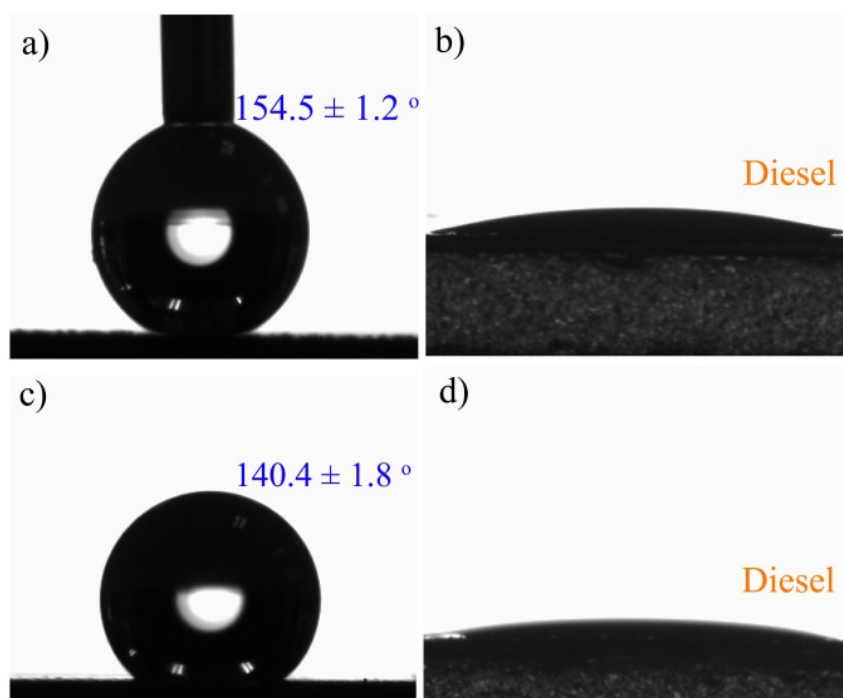

**Fig. S1** The as-prepared mesh showed special wettability: a) the photograph of a water droplet (2  $\mu\text{L}$ ) on the commercial PE coated mesh with a contact angle of  $154.5 \pm 1.2^\circ$ ; b) A diesel oil droplet (2  $\mu\text{L}$ ) spread and permeated quickly on the commercial PE coated mesh; c) the photograph of a water droplet (2  $\mu\text{L}$ ) on the recycled gloves PE coated mesh with a contact angle of  $140.4 \pm 1.8^\circ$ ; d) A diesel oil droplet (2  $\mu\text{L}$ ) spread and permeated quickly on the recycled gloves PE coated mesh.

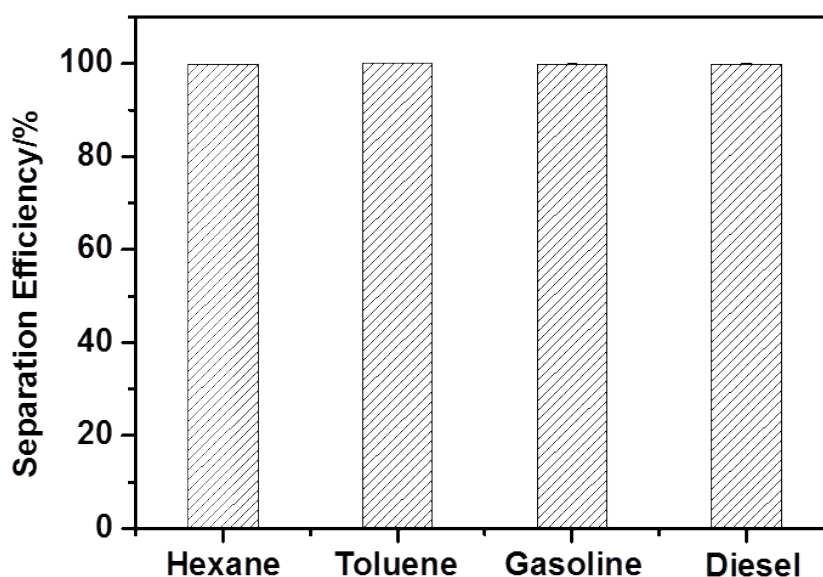

**Fig. S2** The separation efficiencies of the water phase in the upper glass after separation using the recycled gloves PE coated mesh for four kinds of oil/water mixtures.

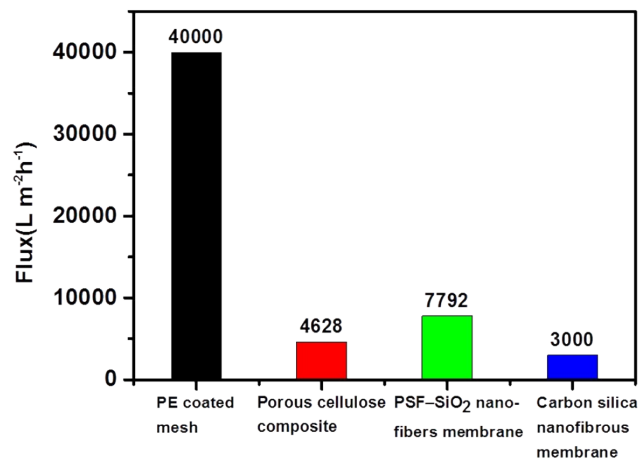

**Fig. S3** The fluxes of the recycled gloves PE coated mesh, porous and hydrophobic cellulose composite, PSF-SiO<sub>2</sub> nanofibers membrane and carbon-silica nanofibrous membrane.

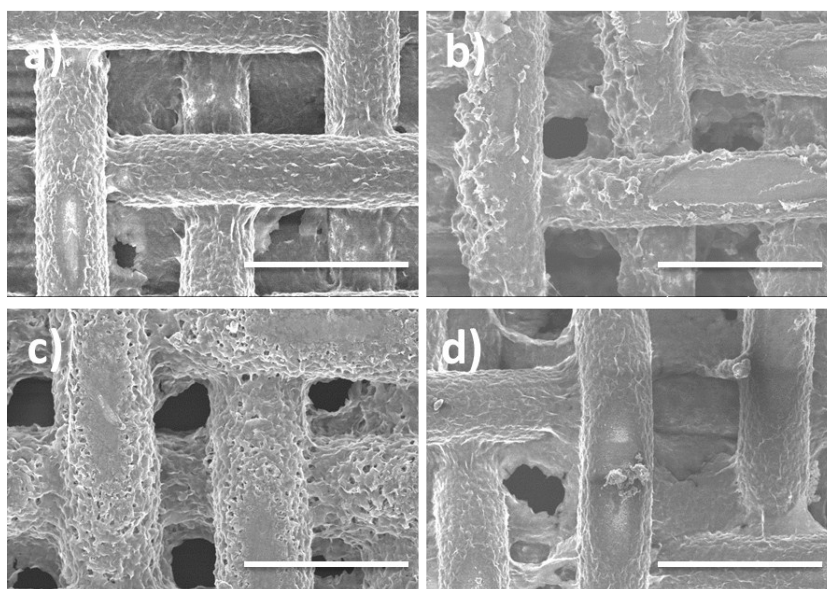

**Fig. S4** SEM images of the mesh after separating four kinds of oil/water mixtures 30 times using the recycled gloves PE coated mesh. a) SEM image of the mesh after separating hexane/water mixtures 30 times. b) SEM image of the mesh after separating toluene/water mixtures 30 times. c) SEM image of the mesh after separating gasoline/water mixtures 30 times. d) SEM image of the mesh after separating diesel/water mixtures 30 times.

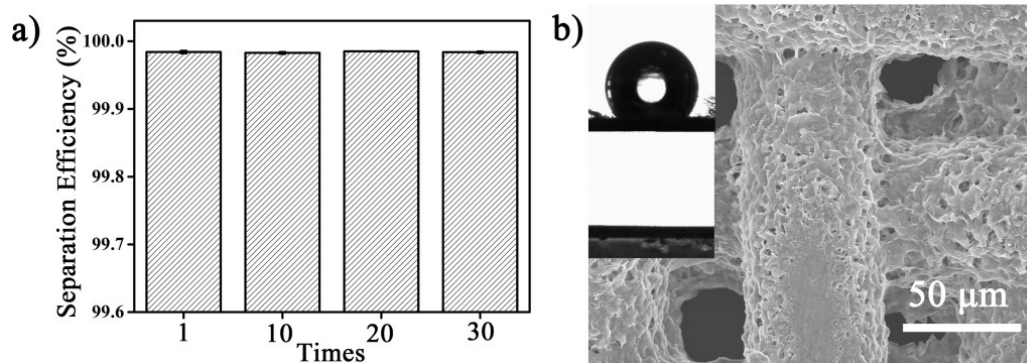

**Fig. S5** a) Oil/water mixtures separation efficiencies of the recycled gloves PE coated mesh after recycle use; b) Contact angle and SEM image of the mesh after 30 times oil/water separation.

Video:

Video S1: oil/water separation by the recycled gloves PE coated mesh.
